# Supplementary material for: Prognostic significance and immune-related prediction of proteomic features in hepatocellular carcinoma
Source: Research Square preprint supplement (doi:10.21203/rs.3.rs-7888187/v1), 2025-10-20
Supplement: Supplementary file 1 [file c9cdb30ea7aaf009c4fcc89e.docx]

Supplementary Table S1 Prognosis-related proteins in HCC.

| Protein name | KM | HR | 95%CI | *P* value* |
| --- | --- | --- | --- | --- |
| ACETYLATUBULINLYS40 | 0.000 | 1.574 | (1.108-2.237) | 0.011 |
| S6_pS235S236 | 0.004 | 0.644 | (0.435-0.953) | 0.028 |
| CRAF_pS338 | 0.010 | 0.127 | (0.023-0.696) | 0.017 |
| PAI1 | 0.022 | 1.385 | (1.128-1.700) | 0.002 |
| AKT | 0.024 | 0.619 | (0.393-0.974) | 0.038 |
| S6 | 0.029 | 1.700 | (1.021-2.829) | 0.041 |
| NOTCH1 | 0.034 | 0.207 | (0.067-0.646) | 0.007 |
| BRAF | 0.034 | 1.872 | (1.139-3.079) | 0.013 |
| P27_pT198 | 0.047 | 0.239 | (0.058-0.977) | 0.046 |
| NF2 | 0.048 | 2.212 | (1.032-4.742) | 0.041 |

Supplementary Table S2 Proteins involved in IPPS model.

| Protein name | Coef | HR | 95%CI | *P* value* |
| --- | --- | --- | --- | --- |
| AKT | -0.887 | 0.411 | (0.246-0.688) | 0.000 |
| BRAF | 0.734 | 2.085 | (1.213-3.582) | 0.007 |
| P27_pT198 | -1.837 | 0.159 | (0.032-0.785) | 0.024 |

Coef: coefficient; HR: Hazard Radio; 95%CI: 95% confidence interval in HR.* P value in Cox regression.

Supplementary Table S3 Protein correlation analysis results.

| **[model](C:/Users/biotech/AppData/Local/youdao/dict/Application/8.9.3.0/resultui/html/index.html" \l "/javascript:;)** **[proteins](C:/Users/biotech/AppData/Local/youdao/dict/Application/8.9.3.0/resultui/html/index.html" \l "/javascript:;)** | **[gap-associated](C:/Users/biotech/AppData/Local/youdao/dict/Application/8.9.3.0/resultui/html/index.html" \l "/javascript:;) [protein](C:/Users/biotech/AppData/Local/youdao/dict/Application/8.9.3.0/resultui/html/index.html" \l "/javascript:;)** | **cor** | **P-value** | **[gap-associated](C:/Users/biotech/AppData/Local/youdao/dict/Application/8.9.3.0/resultui/html/index.html" \l "/javascript:;) [protein](C:/Users/biotech/AppData/Local/youdao/dict/Application/8.9.3.0/resultui/html/index.html" \l "/javascript:;)** | **cor** | **P-value** |
| --- | --- | --- | --- | --- | --- | --- |
| **AKT** | PTEN | 0.579 | 7.08E-18 |  |  |  |
| PRDX1 | -0.530 | 1.06E-14 |  |  |  |
| SMAC | -0.539 | 2.84E-15 |  |  |  |
| **BRAF** | BRD4 | 0.689 | 3.33E-27 | MSH6 | 0.552 | 4.30E-16 |
| BAK | -0.665 | 7.92E-25 | SF2 | -0.552 | 4.59E-16 |
| JNK_pT183Y185 | -0.655 | 6.57E-24 | EGFR_pY1068 | -0.548 | 8.81E-16 |
| KU80 | 0.651 | 1.55E-23 | RBM15 | 0.544 | 1.40E-15 |
| BRCA2 | -0.650 | 1.66E-23 | CMET_pY1235 | -0.538 | 3.19E-15 |
| CRAF | 0.631 | 7.86E-22 | SNAIL | -0.536 | 4.19E-15 |
| X1433BETA | -0.630 | 1.04E-21 | INPP4B | -0.536 | 4.36E-15 |
| ACVRL1 | -0.616 | 1.28E-20 | EIF4G | 0.535 | 5.14E-15 |
| FOXO3A_pS318S321 | -0.608 | 6.06E-20 | P70S6K_pT389 | -0.533 | 7.03E-15 |
| RB | -0.607 | 6.29E-20 | MAPK_pT202Y204 | -0.533 | 7.14E-15 |
| CDK1 | -0.603 | 1.43E-19 | P53 | -0.531 | 8.48E-15 |
| RAD51 | -0.602 | 1.72E-19 | CMYC | -0.530 | 1.03E-14 |
| ARID1A | 0.601 | 1.82E-19 | DUSP4 | -0.529 | 1.16E-14 |
| COG3 | 0.587 | 1.90E-18 | JAB1 | -0.529 | 1.20E-14 |
| TSC1 | 0.586 | 2.51E-18 | ARAF_pS299 | -0.524 | 2.45E-14 |
| ERALPHA | -0.578 | 9.23E-18 | DIRAS3 | -0.518 | 5.02E-14 |
| P90RSK_pT359S363 | -0.577 | 9.88E-18 | X53BP1 | 0.518 | 5.21E-14 |
| CD31 | -0.576 | 1.21E-17 | FOXO3A | -0.513 | 9.20E-14 |
| S6 | 0.573 | 1.88E-17 | BCL2 | -0.508 | 1.90E-13 |
| HEREGULIN | -0.573 | 1.96E-17 | PKCALPHA | 0.505 | 2.68E-13 |
| PARPCLEAVED | -0.573 | 2.02E-17 | MTOR | 0.503 | 3.26E-13 |
| NRAS | -0.559 | 1.53E-16 | SRC_pY416 | -0.502 | 3.73E-13 |
| BRAF_pS445 | 0.558 | 2.02E-16 |  |  |  |
| **P27_pT198** | COLLAGENVI | 0.586 | 2.35E-18 | MRE11 | 0.534 | 5.78E-15 |
| MEK1_pS217S221 | 0.579 | 7.12E-18 | CMYC | 0.533 | 7.19E-15 |
| STATHMIN | 0.564 | 8.14E-17 | MSH6 | -0.509 | 1.59E-13 |


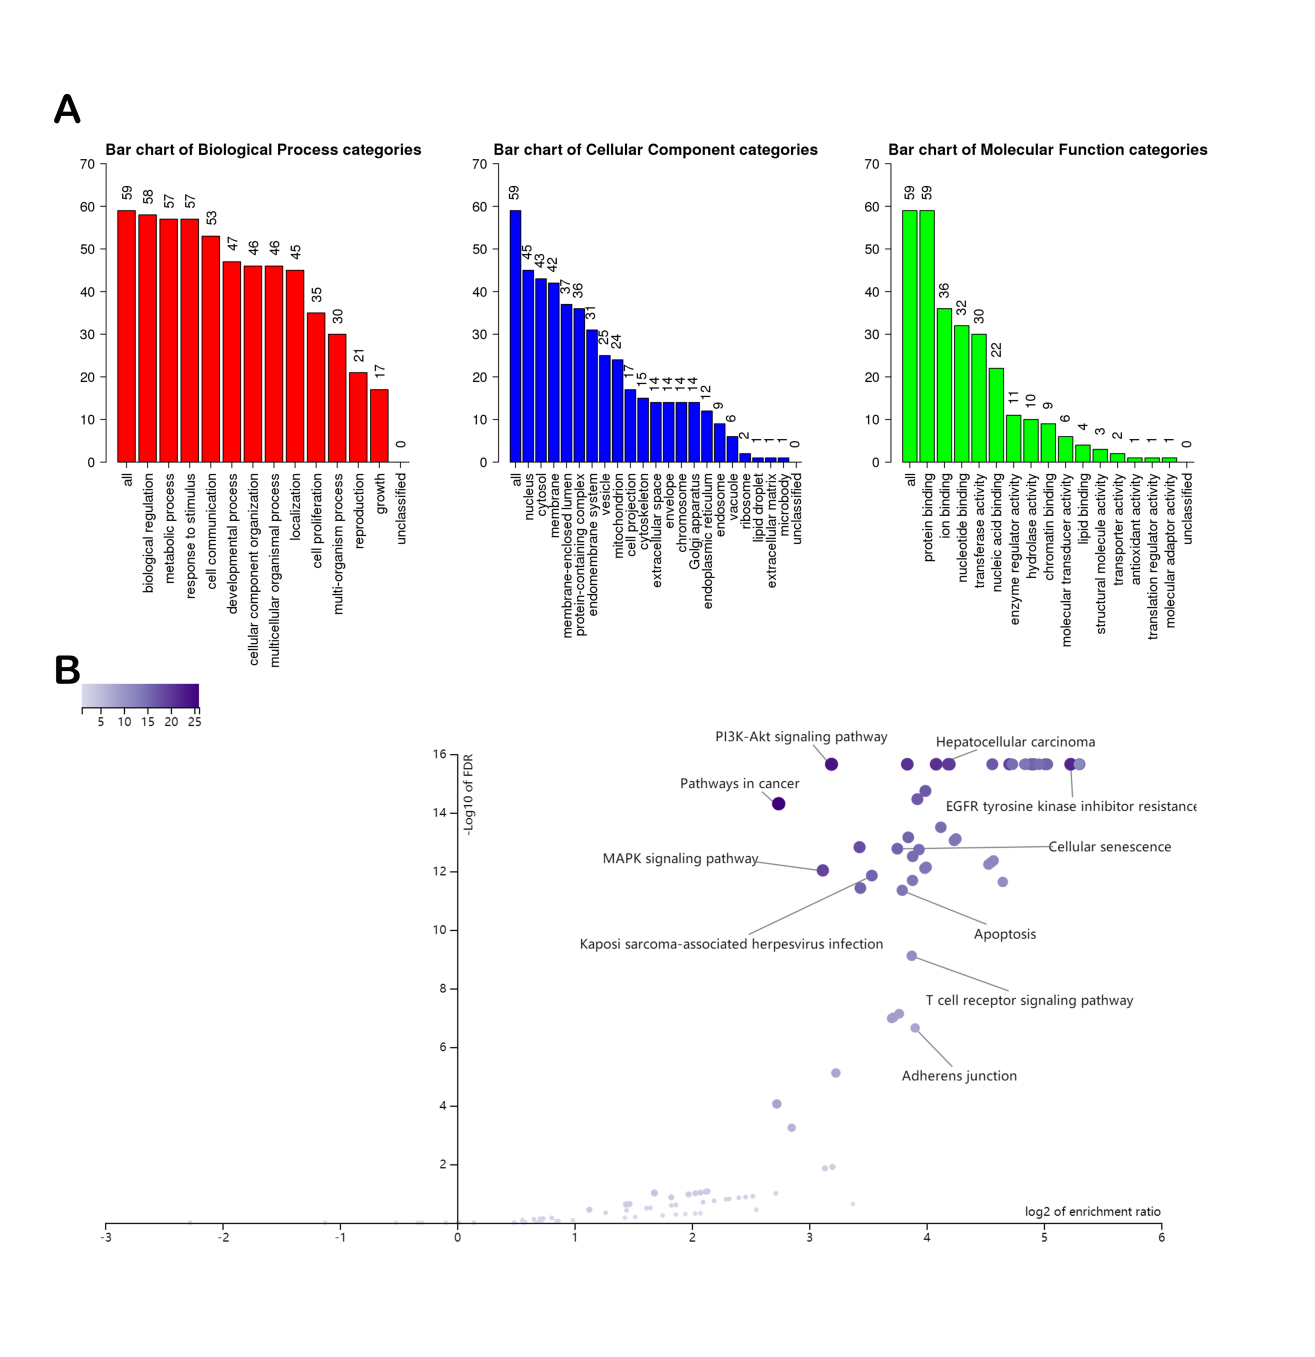


Figure S1 KEGG pathway enrichment analysis showed that signaling pathways such as Hepatocellular carcinoma, PI3k-Akt signaling pathway, and MAPK signaling pathway are associated with prognostic risk model protein-mediated biological regulation.


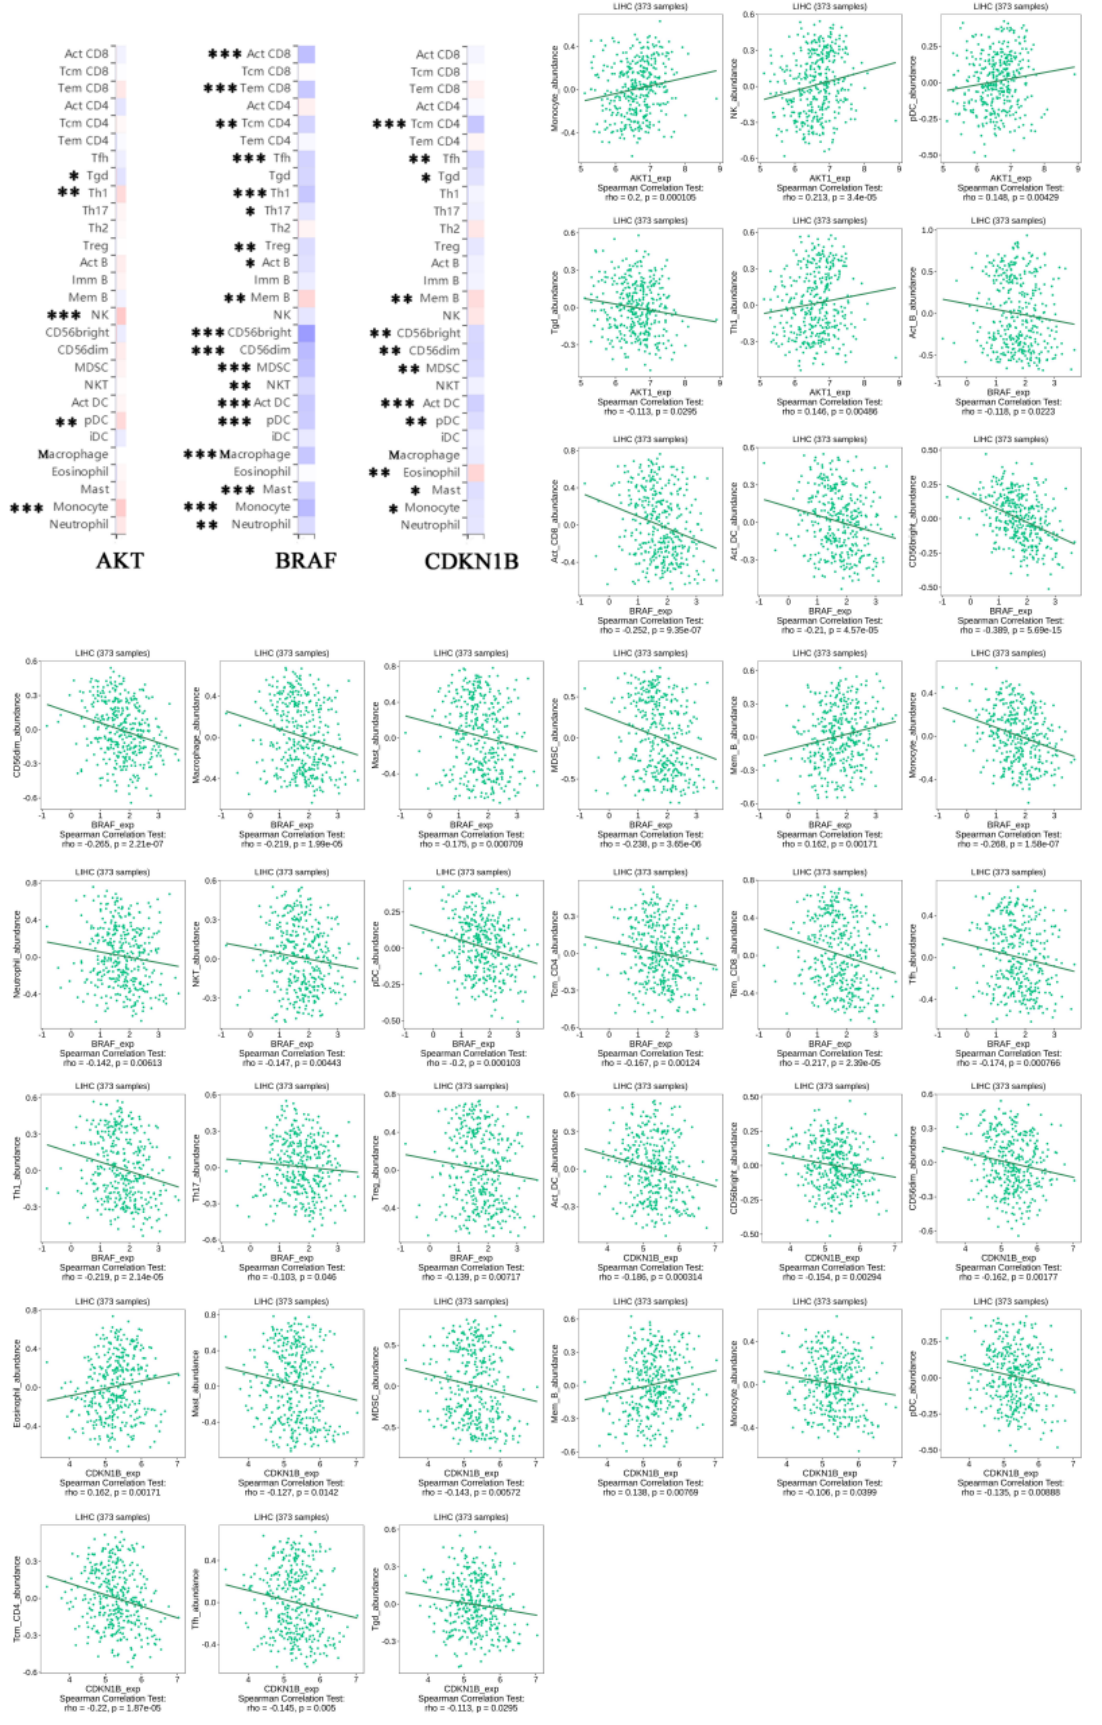


Figure S2 Correlation analysis of prognostic risk model protein expression levels and immune cell subsets in HCC.


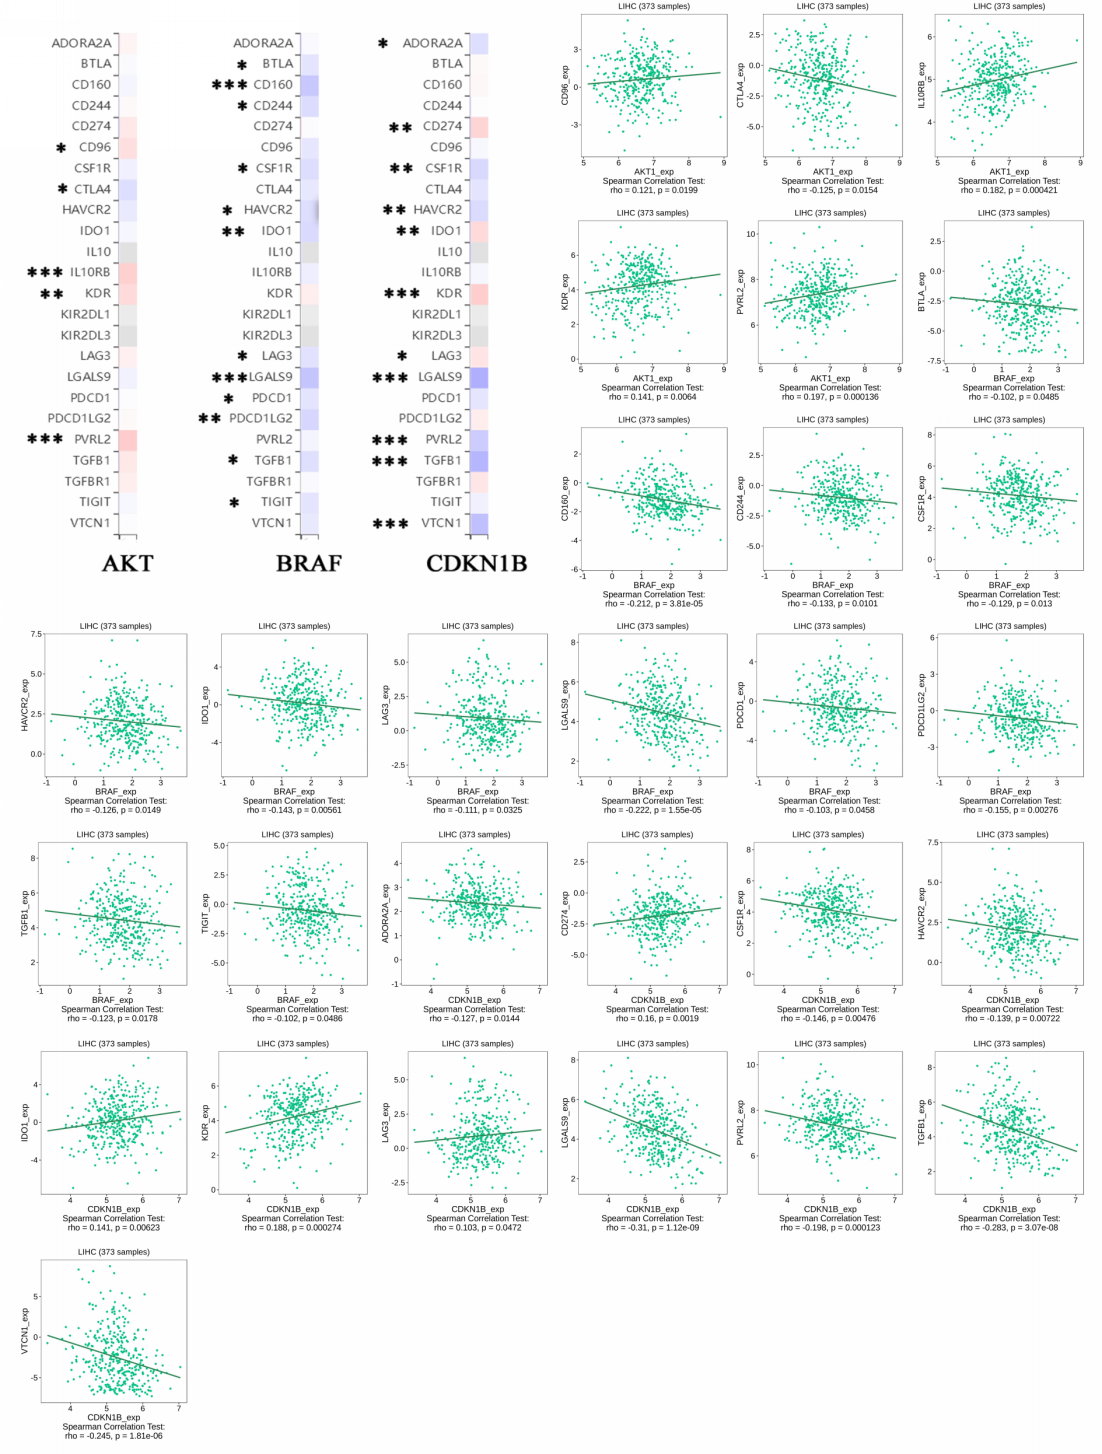


Figure S3 Correlation analysis of prognostic risk model protein expression levels and Immunoinhibitor in HCC.


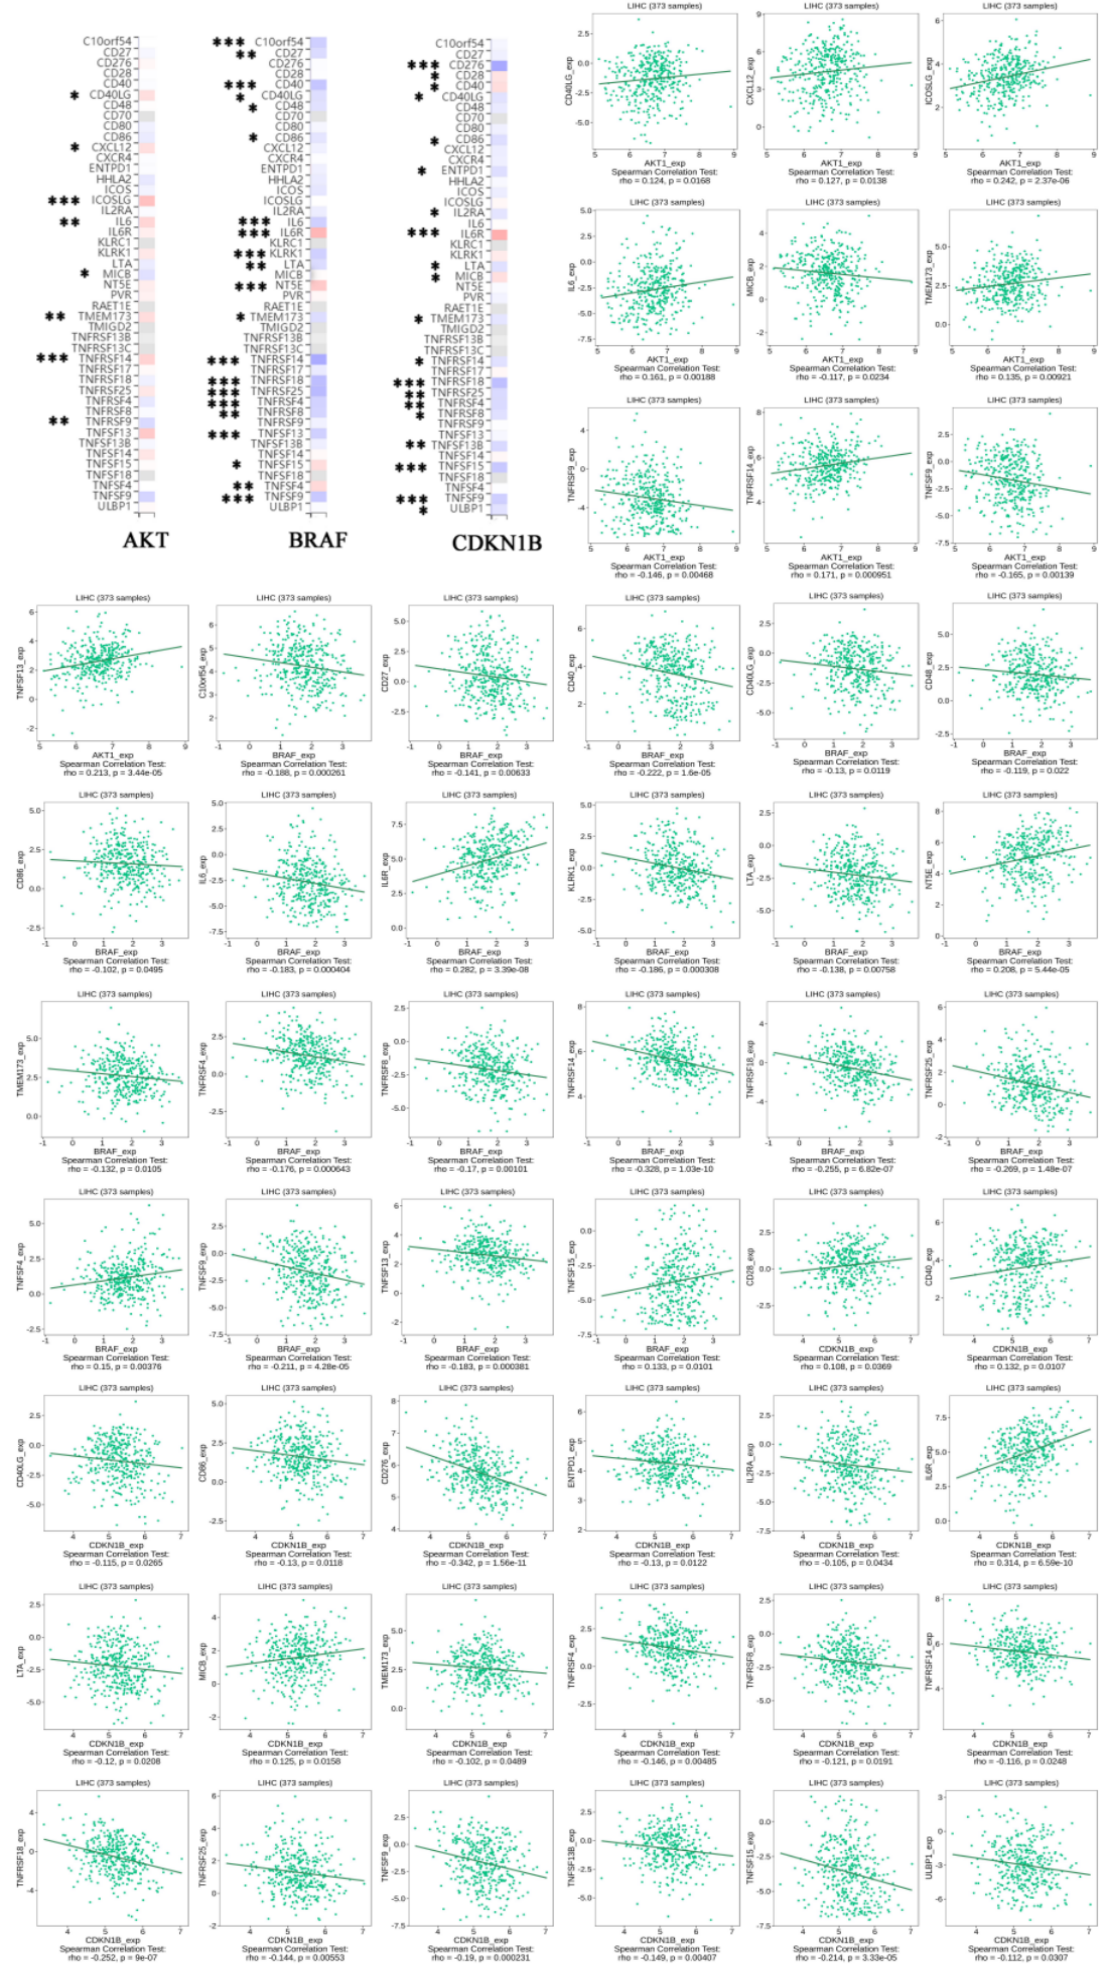


Figure S4 Correlation analysis of prognostic risk model protein expression levels and immune activator in HCC.


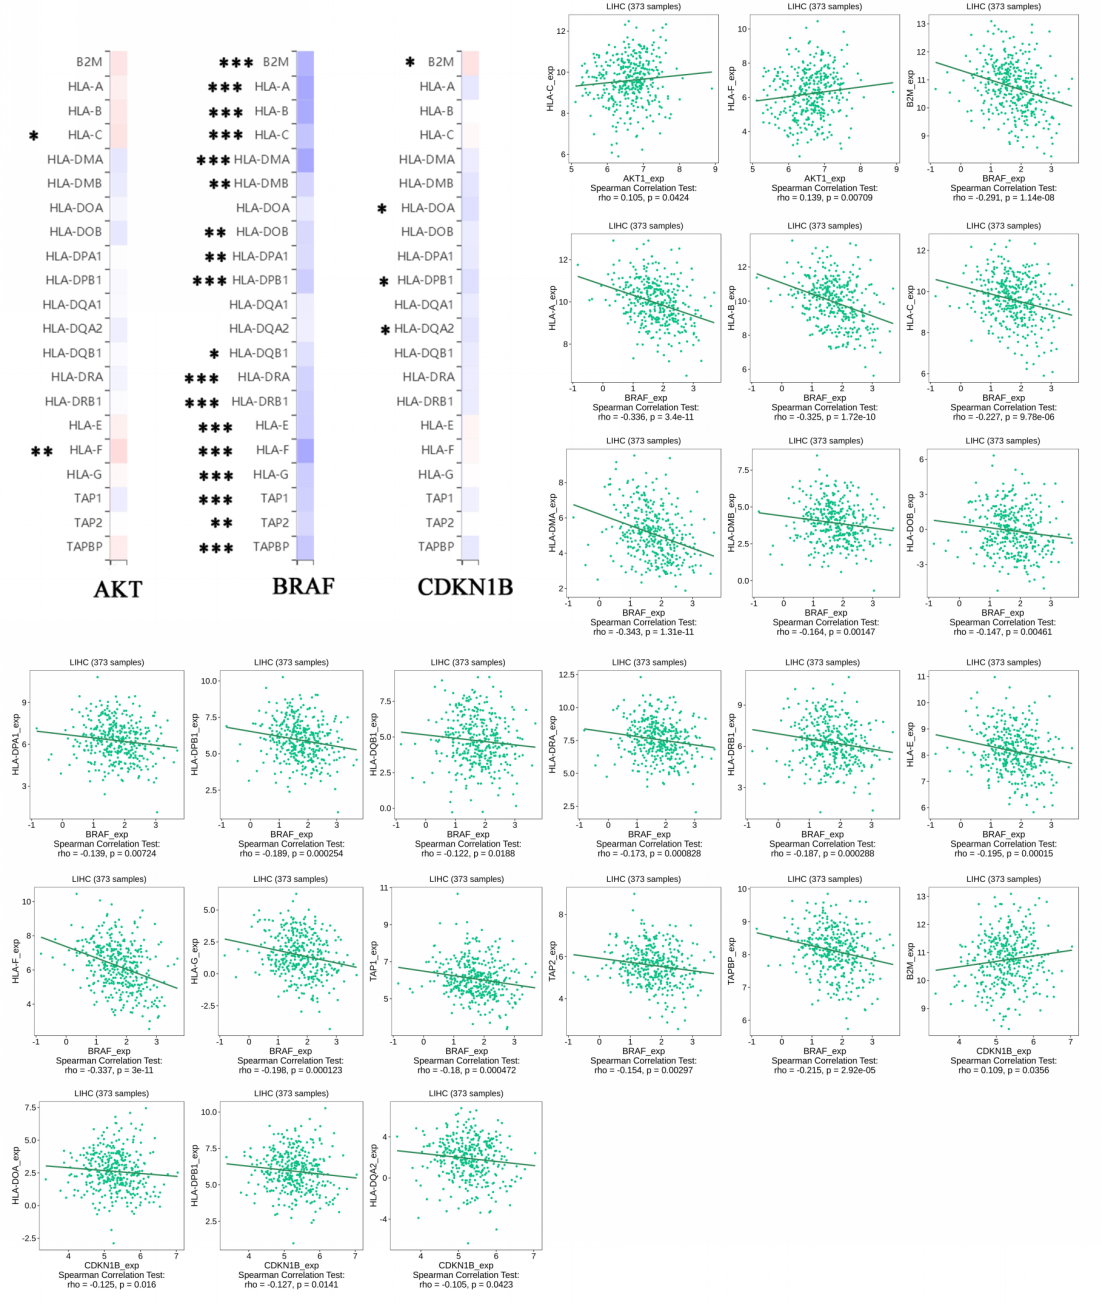


Figure S5 Correlation analysis of prognostic risk model protein expression levels and MHC in HCC.
